# Supplementary material for: New Class of Radially Adjustable Stentrievers for Acute Ischemic Stroke: Primary Results of the Multicenter TIGER Trial
Source: PubMed Central journal article supplement — Stroke. 2021 Mar 19;52(5):1534–44. doi: 10.1161/STROKEAHA.121.034436 (PMC8078128; doi:10.1161/strokeaha.121.034436), 2021-03-19
Supplement: str-52-1534-s002.pdf [file str-52-1534-s002.pdf]

A New Class of Radially-Adjustable Stentriever for Acute Ischemic Stroke: Primary Results  
of the Multicenter Tiger Trial

SUPPLEMENTAL MATERIAL

Corresponding author:

Rishi Gupta, MD, MBA

Wellstar Medical Group, Neurosurgery, Wellstar Health System Kennestone Hospital  
Marietta, GA

Email: [rishi.gupta@wellstar.org](mailto:rishi.gupta@wellstar.org)

## Supplemental Materials

Supplementary Figure I. Tigertriever example case

Supplementary Figure II. Trial statistical design and result

Supplementary Table I. Listing of TIGER Trial Sites and Investigators

Supplementary Table II. TIGER trial inclusion and exclusion criteria

Supplementary Table III: Patient characteristics for lead-in cohort.

Supplementary Table IV: Patient characteristics in TIGER and comparator trials

Supplementary Table V: Reperfusion and clinical efficacy and safety outcomes in TIGER and comparator trials

Supplementary Table VI. Rescue and Concomitant Therapies Employed

Supplementary Table VII. Angiographic and clinical efficacy outcomes in lead-in patients.

Supplementary Table VIII. Primary and Secondary Safety Endpoints in lead-in patients.

Supplementary Table IX: Radiologic classification of asymptomatic intracranial hemorrhages among lead-in, main-study, and all patients

Supplementary Table X: Listing of cases of hemorrhages not meeting sICH criteria definition but adjudicated as SAEs.

Supplementary Table XI. Serious Adverse Events in TIGER trial

Supplementary Results Text I. Reperfusion Rates with Tigertriever and Tigertriever 17 and in Each Target Artery

Supplementary Figure I. Tigertriever example case.

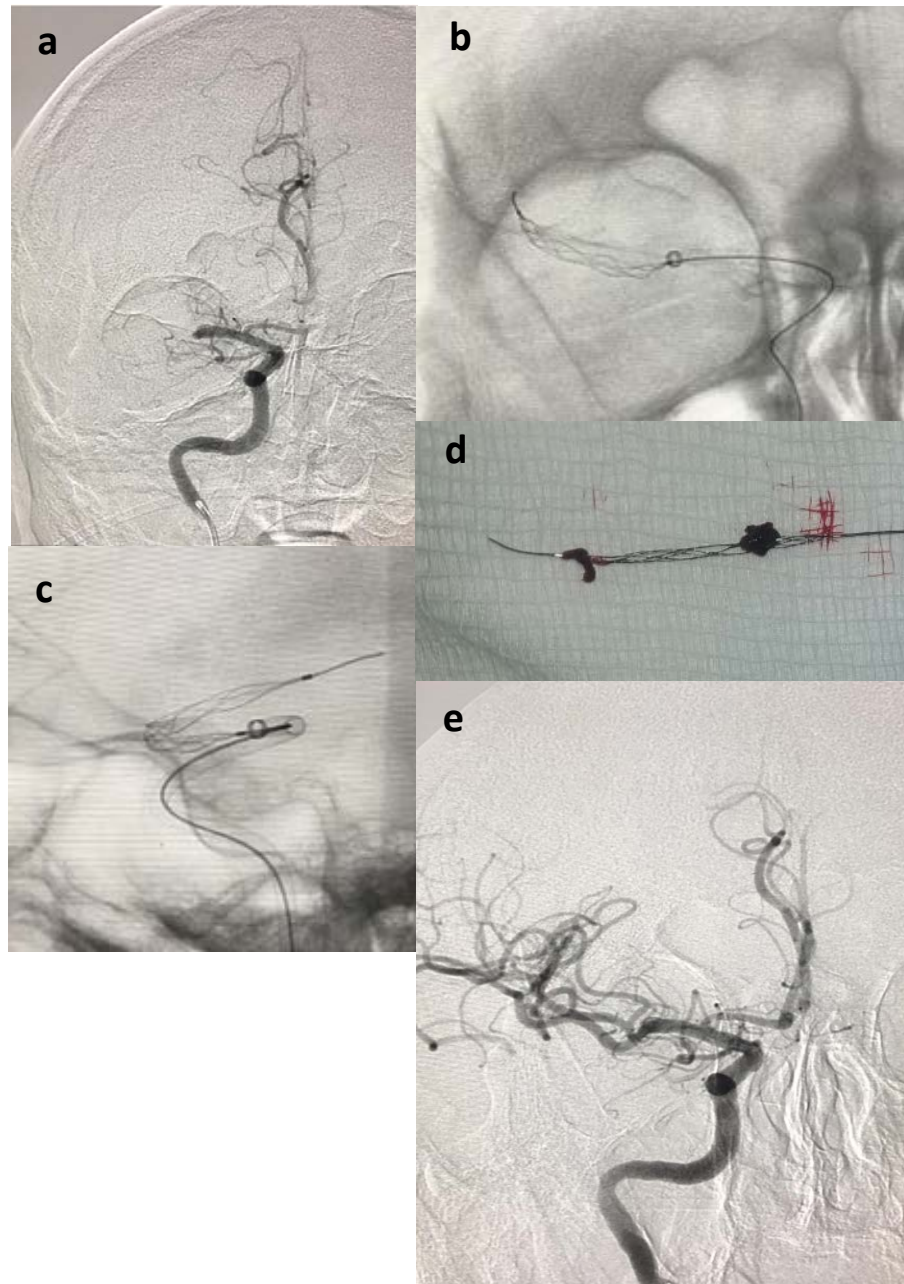

Case example: A 77-year-old male with a right distal M1 middle cerebral artery occlusion. NIHSS 10 at presentation. Received IV tPA with no improvement. a) Initial occlusion of the distal M1; b) Tigertriever device initially device inserted; c) Tigertriever device advanced so that the clot is placed proximal to the mesh; d) Thrombus attached to Tigertriever after withdrawal from body; e) mTICI 3 reperfusion after one pass. NIHSS was 1 at discharge.

Supplementary Figure II. Graphical Depiction of TIGER Trial Design and Results

IIA. Potential Outcomes within the Non-Inferiority Design Framework for Primary Endpoint of mTICI 2b-3 within three Tigertriever passes

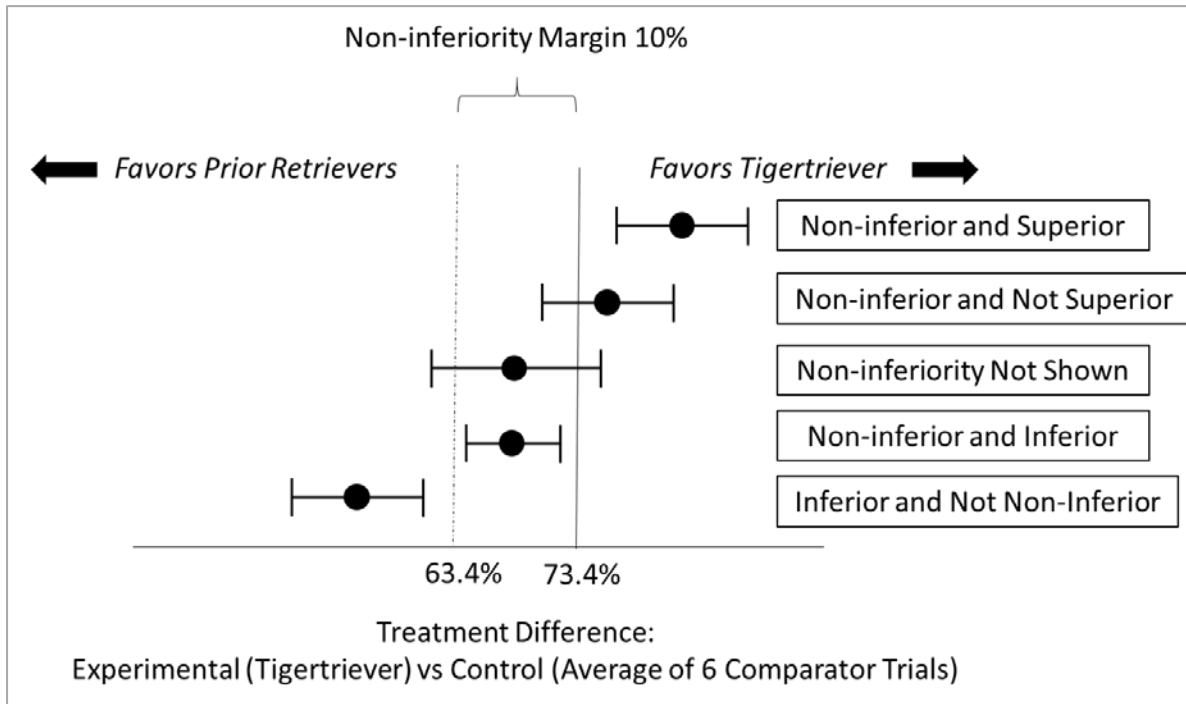

IIB.

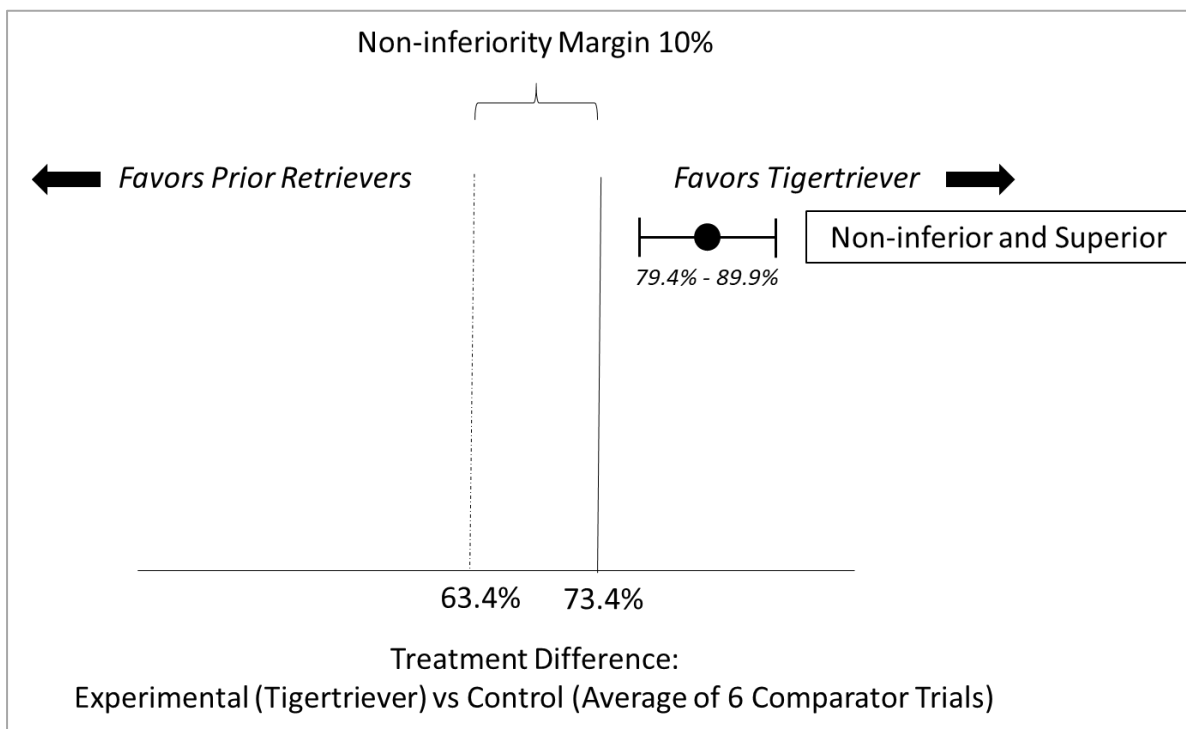

Supplementary Table I. Listing of TIGER Trial Sites and Investigators

|                                      |                                  |
|--------------------------------------|----------------------------------|
| <b>Trial Principal Investigators</b> | Jeffrey Saver                    |
|                                      | Rishi Gupta                      |
| <b>Trial Steering Committee</b>      | Dileep Yavagal                   |
|                                      | Elad Levy                        |
|                                      | Sam Zaidat                       |
|                                      | Ashutosh Jadhav                  |
| <b>Data Safety Monitoring Board</b>  | Vineeta Singh (chairperson)      |
|                                      | Colin P. Derdeyn                 |
|                                      | M. Shazam Hussain                |
|                                      | Scott Hamilton (biostatistician) |
| <b>Clinical Events Committee</b>     | M. Shazam Hussain (Chairperson)  |
|                                      | Colin P. Derdeyn                 |
|                                      | Vineeta Singh                    |
| <b>Imaging Core lab</b>              | David Liebeskind                 |

| <u>Site Name</u>       | <u>Role</u>                                 | <u>First Name</u> | <u>Last Name</u> | <u>Patients Enrolled</u> |
|------------------------|---------------------------------------------|-------------------|------------------|--------------------------|
| Wellstar, Marietta, GA | TIGER Study National Principal Investigator | Rishi             | Gupta            | 31                       |
|                        | Sub-investigator                            | Ahmad             | Khaldi           |                          |
|                        | Sub-investigator                            | William           | Humpries         |                          |
|                        | Sub-investigator                            | Joao McOniel      | Plancher         |                          |
|                        | Sub-investigator                            | Raisa             | Martinez         |                          |
|                        | Study coordinator                           | Marianne          | Bain             |                          |
|                        | Study coordinator                           | Rebecca           | McConnell        |                          |
| UPMC                   | Principal Investigator                      | Bradley           | Gross            | 27                       |
|                        | TIGER Study Steering Committee Member       | Ashutosh          | Jadhav           |                          |
|                        | Sub-investigator                            | Kavit             | Shah             |                          |
|                        | Sub-investigator                            | Merritt           | Brown            |                          |
|                        | Sub-investigator                            | Danoushka         | Tememe           |                          |
|                        | Sub-investigator                            | Christine         | Hawkes           |                          |
|                        | Sub-investigator                            | Maryam            | Zulfiqar         |                          |
|                        | Sub-investigator                            | Shashvat          | Desai            |                          |
|                        | Sub-investigator                            | Bradley           | Molyneaux        |                          |
|                        | Sub-investigator                            | Brian             | Jankowitz        |                          |
|                        | Sub-investigator                            | Sandra            | Narayanan        |                          |
|                        | Study coordinator                           | Cathy             | Van Every        |                          |
| UBNS, Buffalo, NY      | Principal Investigator                      | Kenneth           | Snyder           | 19                       |
|                        | Sub-investigator                            | Adnan             | Siddiqui         |                          |
|                        | Steering Committee Member, Sub-investigator | Elad              | Levy             |                          |
|                        | Sub-investigator                            | Jason             | Davies           |                          |
|                        | Sub-investigator                            | Kunal             | Vakharia         |                          |
|                        | Sub-investigator                            | Michael           | Tso              |                          |

|                                                          |                                                      |            |             |    |
|----------------------------------------------------------|------------------------------------------------------|------------|-------------|----|
|                                                          | Sub-investigator                                     | Stephan    | Munich      |    |
|                                                          | Sub-investigator                                     | Matthew    | Mcphators   |    |
|                                                          | Study coordinator                                    | Staci      | Smith       |    |
|                                                          | Study coordinator                                    | Jennifer   | Gay         |    |
| Mercy St. Vincent's Medical Center,<br>Toledo, OH        | Principal Investigator, Steering<br>Committee Member | Sam        | Zaidat      | 13 |
|                                                          | Sub-investigator                                     | Eugene     | Lin         |    |
|                                                          | Sub-investigator                                     | Mohamad    | Ezzeldin    |    |
|                                                          | Sub-investigator                                     | Bader      | Alenzi      |    |
|                                                          | Study coordinator                                    | Anthony    | Sopko       |    |
| VBMC Harlingen, Harlingen, TX                            | Principal Investigator                               | Ameer      | Hassan      | 11 |
|                                                          | Sub-investigator                                     | Wondwossen | Tekle       |    |
|                                                          | Study coordinator                                    | Rani       | Rabah       |    |
|                                                          | Study coordinator                                    | Olive      | Sanchez     |    |
| Palmetto General Hospital,<br>Hialeah, FL                | Principal Investigator                               | Ritesh     | Kaushal     | 10 |
|                                                          | Sub-investigator                                     | Ali        | Malek       |    |
|                                                          | Sub-investigator                                     | Nils       | Mueller     |    |
|                                                          | Study coordinator                                    | Nancy      | Carbera     |    |
|                                                          | Research Manager                                     | Lisa       | Wettermann  |    |
| Baptist Medical Center<br>Jacksonville, Jacksonville, FL | Principal Investigator                               | Ricardo    | Hanel       | 10 |
|                                                          | Sub-investigator                                     | Eric       | Sauvageau   |    |
|                                                          | Sub-investigator                                     | Amin       | Aghaebrahim |    |
|                                                          | Study coordinator                                    | Lanaya     | Lewis       |    |
|                                                          | Study coordinator                                    | Nancy      | Ebreo       |    |
| University of Miami Medical<br>Center, Miami, FL         | Principal Investigator, Steering<br>Committee Member | Dileep     | Yavagal     | 9  |
|                                                          | Sub-investigator                                     | Eric       | Peterson    |    |
|                                                          | Sub-investigator                                     | Robert     | Starke      |    |
|                                                          | Sub-investigator                                     | Sebastian  | Koch        |    |
|                                                          | Sub-investigator                                     | Vasu       | Saini       |    |

|                                                                          |                        |                 |                    |   |
|--------------------------------------------------------------------------|------------------------|-----------------|--------------------|---|
|                                                                          | Sub-investigator       | Stephanie       | Chen               |   |
|                                                                          | Sub-investigator       | Victor          | Del Brutto Andrade |   |
|                                                                          | Sub-investigator       | Luis            | Torres             |   |
|                                                                          | Sub-investigator       | Muhammad        | Memon              |   |
|                                                                          | Sub-investigator       | Marie-Christine | Brunet             |   |
|                                                                          | Study coordinator      | Paramjot        | Kaur               |   |
| Oregon Health & Science University, Portland, OR                         | Principal Investigator | Hormozd         | Bozorgchami        | 8 |
|                                                                          | Sub-investigator       | Gary            | Nesbit             |   |
|                                                                          | Sub-investigator       | Wayne           | Clark              |   |
|                                                                          | Sub-investigator       | Ryan            | Priest             |   |
|                                                                          | Sub-investigator       | Stewart         | Weber              |   |
|                                                                          | Sub-investigator       | Scott           | Rewinkel           |   |
|                                                                          | Sub-investigator       | Masahiro        | Horikawa           |   |
|                                                                          | Sub-investigator       | Jesse           | Liu                |   |
|                                                                          | Sub-investigator       | Micki           | Stacey             |   |
|                                                                          | Study coordinator      | Natasha         | Barnhill           |   |
| Riverside Methodist Hospital, Columbus, OH                               | Principal Investigator | Ronald          | Budzik             | 6 |
|                                                                          | Sub-investigator       | Peter           | Pema               |   |
|                                                                          | Sub-investigator       | Thomas          | Davis              |   |
|                                                                          | Sub-investigator       | Nirav           | Vora               |   |
|                                                                          | Sub-investigator       | William         | Hicks              |   |
|                                                                          | Sub-investigator       | Brian           | Katz               |   |
|                                                                          | Sub-investigator       | Omran           | Kaskar             |   |
|                                                                          | Sub-investigator       | Aaron           | Loochtan           |   |
|                                                                          | Sub-investigator       | Vivek           | Rai                |   |
|                                                                          | Study coordinator      | Katy            | Groezinger         |   |
| Vascular Neurology of Southern California, Los Robles, Thousand Oaks, CA | Principal Investigator | Asif            | Taqi               | 5 |
|                                                                          | Study coordinator      | Anastasia       | Vechera            |   |
|                                                                          | Principal Investigator | Edgar           | Samaniego          | 3 |



|                                                 |                                                                                                |                        |           |   |
|-------------------------------------------------|------------------------------------------------------------------------------------------------|------------------------|-----------|---|
| University of Iowa Medical Center,<br>Iowa City | Sub-investigator                                                                               | Sami                   | Al Kasab  |   |
|                                                 | Sub-investigator                                                                               | Khaled                 | Asi       |   |
|                                                 | Sub-investigator                                                                               | Sudeepta               | Dandapat  |   |
|                                                 | Sub-investigator                                                                               | David                  | Hansan    |   |
|                                                 | Sub-investigator                                                                               | Minako                 | Hayakawa  |   |
|                                                 | Sub-investigator                                                                               | Enrique                | Leira     |   |
|                                                 | Sub-investigator                                                                               | Kaustubh               | Limaya    |   |
|                                                 | Sub-investigator                                                                               | Santiago               | Ortega    |   |
|                                                 | Sub-investigator                                                                               | James                  | Ronm      |   |
|                                                 | Sub-investigator                                                                               | Amir                   | Shaban    |   |
|                                                 | Sub-investigator                                                                               | Hyungsub               | Shim      |   |
|                                                 | Sub-investigator                                                                               | Emily                  | Jaksich   |   |
|                                                 | Sub-investigator                                                                               | Allison                | Voss      |   |
|                                                 | Study coordinator                                                                              | Heena                  | Olalde    |   |
|                                                 | MCVI Research and Outcomes<br>Department<br>Miami Cardiac and Vascular<br>Institute, Miami, FL | Principal Investigator | Guilherme |   |
| Sub-investigator                                |                                                                                                | Italo                  | Linfante  |   |
| Sub-investigator                                |                                                                                                | Dennys                 | Reyes     |   |
| Study coordinator                               |                                                                                                | Yudmila                | Tamayo    |   |
| MMC                                             | Principal Investigator                                                                         | Erez                   | Nossek    | 2 |
|                                                 | Principal Investigator                                                                         | Qingliang Tony         | Wang      |   |
|                                                 | Sub-investigator                                                                               | Rozvan                 | Buciuc    |   |
|                                                 | Sub-investigator                                                                               | Arkadiy                | Baumval   |   |
|                                                 | Sub-investigator                                                                               | Alice                  | Hong      |   |
|                                                 | Sub-investigator                                                                               | Brenda                 | Cean      |   |
|                                                 | Sub-investigator                                                                               | Ariel                  | Sionov    |   |
|                                                 | Study coordinator                                                                              | Gene                   | Sobol     |   |
| University of Massachusetts , MA,<br>Worcester  | Principal Investigator                                                                         | Ajit                   | Puri      | 2 |
|                                                 | Study coordinator                                                                              | Babba Baiden           | Asare     |   |
|                                                 | Study coordinator                                                                              | Noelle                 | Bodkin    |   |
|                                                 | Principal Investigator                                                                         | Sidney                 | Starkman  | 1 |

|                                                      |                                                               |            |                 |   |
|------------------------------------------------------|---------------------------------------------------------------|------------|-----------------|---|
| UCLA Medical Center, Los Angeles, CA                 | TIGER Study National Principal Investigator, Sub investigator | Jeffrey    | Saver           |   |
|                                                      | Sub-investigator                                              | Kunakorn   | Atchaneeyasakul |   |
|                                                      | Sub-investigator                                              | Adrian     | Burgos          |   |
|                                                      | Sub-investigator                                              | Geoffrey   | Colby           |   |
|                                                      | Sub-investigator                                              | Gary       | Duckwiler       |   |
|                                                      | Sub-investigator                                              | Jason      | Hinman          |   |
|                                                      | Sub-investigator                                              | Reza       | Jahan           |   |
|                                                      | Sub-investigator                                              | Kyle       | Kern            |   |
|                                                      | Sub-investigator                                              | Zuolu      | Liu             |   |
|                                                      | Sub-investigator                                              | May        | Nour            |   |
|                                                      | Sub-investigator                                              | Neal       | Rao             |   |
|                                                      | Sub-investigator                                              | Radoslav   | Raychev         |   |
|                                                      | Sub-investigator                                              | Latisha    | Sharma          |   |
|                                                      | Sub-investigator                                              | Viktor     | Szeder          |   |
|                                                      | Sub-investigator                                              | Satoshi    | Tateshima       |   |
|                                                      | Study coordinator                                             | Ileana     | Grunberg        |   |
| Rambam Health Care Campus                            | Principal Investigator                                        | Eitan      | Abergel         | 1 |
|                                                      | Study coordinator                                             | Viktoria   | Lasker          |   |
| Hackensack University Medical Center, Hackensack, NJ | Principal Investigator                                        | Daniel     | Walzman         | 0 |
|                                                      | Sub-investigator                                              | Reza       | Karimi          |   |
|                                                      | Sub-investigator                                              | Bruce      | Zablow          |   |
| Advocate Research Institute, Park Ridge              | Study coordinator                                             | David      | Lai             | 0 |
|                                                      | Principal Investigator                                        | Demetrius  | Lopes           |   |
|                                                      | Sub-investigator                                              | Scott      | Geraghty        |   |
|                                                      | Sub-investigator                                              | Thomas     | Grobelny        |   |
|                                                      | Sub-investigator                                              | Bridget    | Cantrell        |   |
| Sub-investigator                                     | Kiffon                                                        | Keigher    |                 |   |
| Study coordinator                                    | Gina                                                          | Littlejohn |                 |   |

Supplementary Table II. TIGER trial inclusion and exclusion criteria

| <b>TIGER Inclusion Criteria</b>                                                                                                                                                                                                                                                                                                      |
|--------------------------------------------------------------------------------------------------------------------------------------------------------------------------------------------------------------------------------------------------------------------------------------------------------------------------------------|
| 1. New focal neurologic deficit consistent with being of acute cerebral ischemia origin.                                                                                                                                                                                                                                             |
| 2. Age 18-85 years old (inclusive).                                                                                                                                                                                                                                                                                                  |
| 3. Interventionalist estimates that treatment with the Tigertriever (first deployment in target vessel) can be achieved within 8 hours of symptom onset.                                                                                                                                                                             |
| 4. Patient either: a) eligible for, and received, IV t-PA within 3 hours of symptom onset, at the correct 0.9 mg/kg dose, or b) ineligible for IV t-PA.                                                                                                                                                                              |
| 5. NIH Stroke Scale score of 8-29.                                                                                                                                                                                                                                                                                                   |
| 6. No known significant pre-stroke disability (prestroke mRS 0 or 1).                                                                                                                                                                                                                                                                |
| 7. Catheter angiographic confirmation of a large vessel occlusion in the intracranial internal carotid artery, the M1 or M2 segments of the middle cerebral artery, the intracranial vertebral artery, or the basilar artery that is accessible to Tigertriever device.                                                              |
| 8. For strokes in the anterior circulation, the following imaging criteria should also be met:<br><ul style="list-style-type: none"> <li>a. MRI criterion: volume of diffusion restriction visually assessed <math>\leq 50</math> mL, OR</li> <li>b. CT criterion: ASPECTS 6 to 10 on baseline NCCT or CTA-source images,</li> </ul> |
| 9. For strokes in the posterior circulation, the following imaging criterion should also be met: pcASPECTS score 8 to 10 on baseline NCCT, CTA-source images, or DWI MRI.                                                                                                                                                            |
| 10. Anticipated life expectancy of at least 6 months.                                                                                                                                                                                                                                                                                |
| 11. A signed informed consent by patient or a Legally Authorized Representative or independent physician in case of oral consent.                                                                                                                                                                                                    |

| <b>TIGER Exclusion Criteria</b>                                                                                                                                                                                            |
|----------------------------------------------------------------------------------------------------------------------------------------------------------------------------------------------------------------------------|
| 1. Subject already participating in another study of an investigational treatment device or treatment.                                                                                                                     |
| 2. Use of any other intra-arterial recanalization drug or device prior to the Tigertriever (Tigertriever not as first choice device).                                                                                      |
| 3. Angiographically evident excessive arterial tortuosity precluding device access to the thrombus.                                                                                                                        |
| 4. For all patients, severe sustained hypertension with SBP >220 and/or DBP >120; for patients treated with IV tPA, sustained hypertension despite treatment with SBP >185 and/or DBP > 110.                               |
| 5. Glucose < 50 mg/dl (2.78 mmol/L) or > 400 mg/dl (22.20 mmol/L).                                                                                                                                                         |
| 6. Known hemorrhagic diathesis.                                                                                                                                                                                            |
| 7. Coagulation factor deficiency or oral anti-coagulant therapy with an international normalized ratio (INR) of more than 3.0.                                                                                             |
| 8. Treatment with heparin within 48 h with a partial thromboplastin time more than two times the laboratory normal.                                                                                                        |
| 9. Patients who have received a direct thrombin inhibitor within the last 48 hours; must have a partial thromboplastin time (PTT) less than 1.5 times the normal to be eligible.                                           |
| 10. Platelet count of less than 50,000/uL.                                                                                                                                                                                 |
| 11. History of severe allergy to contrast medium, nickel, or Nitinol.                                                                                                                                                      |
| 12. Intracranial hemorrhage.                                                                                                                                                                                               |
| 13. Significant mass effect with midline shift.                                                                                                                                                                            |
| 14. Intracranial tumor (apart from small meningioma, $\leq$ 2 cm in diameter).                                                                                                                                             |
| 15. Stenosis or any occlusion in the deployment site or in a proximal vessel requiring treatment or preventing device access to the thrombus (for example, stenosis or occlusion in the cervical internal carotid artery). |
| 16. Females who are pregnant or breastfeeding.                                                                                                                                                                             |
| 17. Known current use of cocaine at time of treatment.                                                                                                                                                                     |
| 18. Prior recent stroke in the past 3 months.                                                                                                                                                                              |

|                                                                                                                                                          |
|----------------------------------------------------------------------------------------------------------------------------------------------------------|
| 19. Renal failure with serum creatinine >3.0 or Glomerular Filtration Rate (GFR) <30.                                                                    |
| 20. Known cerebral vasculitis.                                                                                                                           |
| 21. Rapidly improving neurological status defined as improvement of greater than 8 points on the NIHSS or improvement to NIHSS of < 6 prior to procedure |
| 22. Clinical symptoms suggestive of bilateral stroke or stroke in multiple territories.                                                                  |
| 23. Ongoing seizure due to stroke.                                                                                                                       |
| 24. Evidence of active systemic infection.                                                                                                               |
| 25. Known cancer with metastases.                                                                                                                        |
| 26. Suspicion of aortic dissection, septic embolus, or bacterial endocarditis.                                                                           |
| 27. Evidence of dissection in the extra or intracranial cerebral arteries.                                                                               |
| 28. Occlusions in multiple vascular territories (e.g., bilateral anterior circulation, or anterior/posterior circulation).                               |
| 29. Aneurysm in target vessel.                                                                                                                           |

Supplementary Table III: Patient characteristics for lead-in cohort.

|                                                            | TIGER                |
|------------------------------------------------------------|----------------------|
|                                                            | Lead-In<br>(n=43)    |
| Age, y; mean (SD)                                          | 66 (14)              |
| Male sex, n (%)                                            | 20 (46.5%)           |
| Race, n (%)                                                |                      |
| White                                                      | 35 (81.4%)           |
| Black                                                      | 7 (16.3%)            |
| Asian                                                      | 1 (2.3%)             |
| Hispanic ethnicity, n (%)                                  | 8 (18.6%)            |
| NIHSS Score                                                |                      |
| Mean (SD)                                                  | 18.3 (5.7)           |
| Median (IQR)                                               | 18 (15-22)           |
| Baseline CT ASPECT score                                   |                      |
| Mean (SD)                                                  | 8.6 (1.3)            |
| Median (IQR)                                               | 9 (8-10)             |
| Prestroke mRS, n (%)                                       |                      |
| (n=40)                                                     |                      |
| 0-1                                                        | 39 (97.5%)           |
| 0                                                          | 34 (85.0%)           |
| 1                                                          | 5 (12.5%)            |
| Body mass index, median (IQR)                              | 30.4<br>(25.7-36.3)  |
| Medical history, n (%)                                     |                      |
| Hypertension                                               | 37 (86%)             |
| Diabetes mellitus                                          | 16 (37.2%)           |
| Atrial fibrillation                                        | 13 (30.2%)           |
| Dyslipidemia                                               | 24 (55.8%)           |
| Previous MI/CAD                                            | 11 (25.6%)           |
| Previous ischemic stroke/transient<br>ischemic attack      | 4 (9.3%)             |
| Intravenous tPA failure                                    | 34 (79.1%)           |
| Proximal occlusion location, n (%)                         |                      |
| Internal carotid artery                                    | 7 (16.3%)            |
| M1 middle cerebral artery                                  | 20 (46.5%)           |
| M2 middle cerebral artery                                  | 14 (32.6%)           |
| Basilar artery                                             | 2 (4.7%)             |
| Occlusion side (left)                                      | 21 (48.8%)           |
| Last known well to arterial puncture,<br>min; median (IQR) | 212<br>(124.3-316.3) |
| Procedure aspects                                          |                      |
| General anesthesia                                         | 24 (55.8%)           |
| Balloon guide catheter (BGC) use only                      | 18 (41.9%)           |
| BGC+ Intermediate catheter use                             | 21 (48.8%)           |
| Intermediate catheter use only                             | 7 (16.3%)            |

Supplementary Table IV: Patient characteristics in TIGER and comparator trials

|                                                    | TIGER<br>Main-Study<br>(n=117) | TREVO 2<br>(n=88) | SWIFT<br>(n=58) | MR CLEAN<br>(n=233) | REVASCAT<br>(n=103) | ESCAPE<br>(n=165) | SWIFT<br>PRIME<br>(n=98) | ARISE II<br>(n=227) |
|----------------------------------------------------|--------------------------------|-------------------|-----------------|---------------------|---------------------|-------------------|--------------------------|---------------------|
| Age, y; mean (SD) or median (IQR)                  | 65 (15)                        | 67 (13.9)         | 67 (12)         | 65.8 (54.5-76)      | 66 (11.3)           | 71 (60-81)        | 65 (12.5)                | 68 (13)             |
| Male sex, (%)                                      | 61.5%                          | 45%               | 48%             | 57.9%               | 53.4%               | 47.9%             | 55%                      | 45.8%               |
| NIHSS Score                                        |                                |                   |                 |                     |                     |                   |                          |                     |
| Mean (SD)                                          | 17.4 (5.6)                     | 18.3 (5.3)        | 17.3 (4.5)      | NA                  | NA                  | NA                | NA                       | 15.8 (5)            |
| Median (IQR)                                       | 17 (12-21)                     | 19 (14-21.3)      | 18 (9-28)       | 17 (14-21)          | 17 (14-20)          | 16 (13-20)        | 17 (13-20)               | 16 (12-19)          |
| Baseline CT ASPECT score                           |                                |                   |                 |                     |                     |                   |                          |                     |
| Mean (SD)                                          | 8.9 (1.1)                      | NA                | NA              | NA                  | NA                  | NA                | NA                       | 9.2 (1.5)           |
| Median (IQR)                                       | 9 (8-10)                       | NA                | NA              | 9 (7-10)            | 7 (6-9)             | 9 (8-10)          | 9 (7-10)                 | 19 (9-10)           |
| Prestroke status, (%)                              |                                |                   |                 |                     |                     |                   |                          |                     |
| Prestroke mRS 0-1 or nearest reported              | 99.2%                          | 100%              | 0-2 96%         | 90.6%               | 100%                | NA                | 98%                      | 22%                 |
| Body mass index, mean (SD) or median (IQR)         | 29.5 (25-35)                   | 30 (25.7-33.5)    | 29.3 (6.8)      | NA                  | NA                  | NA                | NA                       | 27.4 (24.1-31.1)    |
| Medical history, (%)                               |                                |                   |                 |                     |                     |                   |                          |                     |
| Hypertension                                       | 76%                            | 76%               | 72%             | NA                  | 60.2%               | 63.6%             | 67%                      | 68.3%               |
| Diabetes mellitus                                  | 30.8%                          | 38%               | 24%             | 14.6%               | 21.4%               | 20%               | 12%                      | 19.8%               |
| Atrial fibrillation                                | 40.2%                          | 48%               | 45%             | 28.3%               | 34%                 | 37%               | 36%                      | 39.6%               |
| Dyslipidemia                                       | 48.7%                          | 63%               | 53%             | NA                  | NA                  | NA                | NA                       | 43.2%               |
| Previous MI/CAD                                    | 19.7%                          | 33%               | 33%             | NA                  | NA                  | NA                | 8%                       | 19.8%               |
| Previous ischemic stroke/transient ischemic attack | 13.7%                          | 28%               | 20%             | 12.4%               | 11.7%               | NA                | NA                       | 18.9%               |
| Intravenous tPA failure                            | 65.8%                          | 58%               | 33%             | NA                  | 68%                 | 72.7%             | 100%                     | 52.9%               |
| Procedure aspects                                  |                                |                   |                 |                     |                     |                   |                          |                     |
| Balloon guide catheter (BGC) use only              | 21.4%                          | NA                | NA              | NA                  | NA                  | NA                | NA                       | 73.6%               |
| BGC+ Intermediate catheter use                     | 8.5%                           | NA                | NA              | NA                  | NA                  | NA                | NA                       | NA                  |
| Intermediate catheter use only                     | 17.9%                          | NA                | NA              | NA                  | NA                  | NA                | NA                       | 41%                 |
| Proximal occlusion location, (%)                   |                                |                   |                 |                     |                     |                   |                          |                     |
| Internal carotid artery                            | 20.5%                          | 16%               | 21%             | 25.3%               | 25.5%               | 27.6%             | 18%                      | 15.4%               |
| M1 middle cerebral artery                          | 57.3%                          | 60%               | 66%             | 66.1%               | 64.7%               | 68.1%             | 67%                      | 55.5%               |
| M2 middle cerebral artery                          | 19.7%                          | 16%               | 10%             | 7.7%                | 9.8%                | 3.7%              | 14%                      | 25.1%               |

|                                                                          |                    |                  |                 |                  |                  |    |                  |                  |
|--------------------------------------------------------------------------|--------------------|------------------|-----------------|------------------|------------------|----|------------------|------------------|
| Basilar artery                                                           | 2.6%               | 8%               | 2%              | NA               | NA               | NA | NA               | 4%               |
| Occlusion side (left)                                                    | 41%                | 53%              | 47%             | 49.8%            | NA               | NA | NA               | 45.5%            |
| Last known well or symptom onset to arterial puncture, min; median (IQR) | 172<br>(128.3-273) | 282<br>(210-342) | 293.5<br>(85.6) | 260<br>(210-313) | 269<br>(201-340) | NA | 224<br>(165-275) | 214<br>(155-266) |



Supplementary Table V: Reperfusion and clinical efficacy and safety outcomes in TIGER and comparator trials

|                                                                                 | TIGER<br>Main-Study<br>(n=117) | TREVO 2*<br>(n=88) | SWIFT*<br>(n=58) | MR CLEAN*<br>(n=233) | REVASCAT*<br>(n=103) | ESCAPE*<br>(n=165) | SWIFT*<br>PRIME<br>(n=98) | ARISE II<br>(n=227) |
|---------------------------------------------------------------------------------|--------------------------------|--------------------|------------------|----------------------|----------------------|--------------------|---------------------------|---------------------|
| Successful reperfusion (mTICI 2b-3) within 3 passes without rescue              | 84.6%                          | 78%                | 76%              | 59%                  | 65.7%                | 73.8%              | 88%                       | 80%                 |
| Use of rescue therapy                                                           | 28.2%                          | 18%                | 21%              | NA                   | NA                   | NA                 | NA                        | 19.4%               |
| Successful reperfusion (mTICI 2b-3) at end of procedure, including after rescue | 95.7%                          | 92%                | 89%              | 59%                  | 65.7%                | 73.8%              | 88%                       | 92.5%               |
| Embolization to new territory                                                   | 2.6%                           | 7%                 | NA               | 8.6%                 | 4.9%                 | NA                 | NA                        | 6.6%                |
| Symptomatic intracranial hemorrhage                                             | 1.7%**                         | 7%                 | 1.7%             | 7.7%                 | 4.9%                 | 3.6%               | 0%                        | 5.3%                |
| Mortality by 90d                                                                | 18.1%**                        | 33%                | 17.2%            | 21%                  | 18.4%                | 10.4%              | 9%                        | 9%                  |
| Functional independence (mRS 0-2) at 90d                                        | 58%                            | 40%                | 37%              | 32.6%                | 44%                  | 53%                | 60%                       | 67.3%               |
| Time from puncture to reperfusion, minutes, median (IQR) or mean ( $\pm$ SD)    | 24 (16-38)                     | 78.8 ( $\pm$ 49.6) | N/A              | N/A                  | 59 (36–95)           | 30 (18-45.5)       | 32 (mean)                 | 45 (24-61)          |
| * The six pivotal trails used for historical control.                           |                                |                    |                  |                      |                      |                    |                           |                     |

Supplementary Table VI. Rescue and Concomitant Therapies Employed

|                                                                                                                                                                                                                                                                                                                         | Lead-In Phase<br>(N=43)<br>n (%) | Main-Study Phase<br>(N=117)<br>n (%) | All Patients<br>(N=160)<br>n (%) |
|-------------------------------------------------------------------------------------------------------------------------------------------------------------------------------------------------------------------------------------------------------------------------------------------------------------------------|----------------------------------|--------------------------------------|----------------------------------|
| <b>Rescue therapy</b>                                                                                                                                                                                                                                                                                                   |                                  |                                      |                                  |
| Any rescue therapy                                                                                                                                                                                                                                                                                                      | 18 (41.9%)                       | 33 (28.2%)                           | 51* (31.9%)                      |
| Mechanical thrombectomy device                                                                                                                                                                                                                                                                                          | 17 (39.5%) <sup>#</sup>          | 29 (24.8%)                           | 46 (28.8%)                       |
| Intra-arterial tPA                                                                                                                                                                                                                                                                                                      | 1 (2.3%)                         | 4 (3.4%)                             | 5 (3.1%)                         |
| Intracranial Stenting                                                                                                                                                                                                                                                                                                   | 1 (2.3%)                         | 3 (2.6%)                             | 4 (2.5%)                         |
| Angioplasty                                                                                                                                                                                                                                                                                                             | 1 (2.3%)                         | 0                                    | 1 (0.6%)                         |
| <p>*Patients might have more than one rescue therapy type used.<br/>           + All rescues passes used other stent retrievers with or without aspiration catheters.<br/>           # In two lead in cases another rescue stentriever was used for new occlusion (not original occlusion treated by Tigertriever).</p> |                                  |                                      |                                  |

Supplementary Table VII. Angiographic and clinical efficacy outcomes in lead-in patients.

|                                                                                         | TIGER                   |
|-----------------------------------------------------------------------------------------|-------------------------|
|                                                                                         | lead-in<br>(n=43)       |
| <b>Primary efficacy endpoint</b>                                                        |                         |
| Successful reperfusion (mTICI 2b-3) within 3 Tigertriever passes without rescue), n (%) | 31 (72.1%)              |
| <b>Angiographic outcomes within 3 Tigertriever passes</b>                               |                         |
| Excellent reperfusion (mTICI 2c-3 within 3 Tigertriever passes without rescue), n (%)   | 20 (46.5%)              |
| 0                                                                                       | 8 (18.6%)               |
| 1                                                                                       | 0                       |
| 2a                                                                                      | 4 (9.3%)                |
| 2b                                                                                      | 11 (25.6%)              |
| 2c                                                                                      | 2 (4.7%)                |
| 3                                                                                       | 18 (41.9%)              |
| <b>Other angiographic and procedural outcomes</b>                                       |                         |
| Final successful reperfusion (mTICI 2b-3)                                               | 38 (88.4%)              |
| Final excellent reperfusion (mTICI 2-3c)                                                | 22 (51.2%)              |
| 0                                                                                       | 1 (2.3%)                |
| 1                                                                                       | 0                       |
| 2a                                                                                      | 4 (9.3%)                |
| 2b                                                                                      | 16 (37.2%)              |
| 2c                                                                                      | 3 (7.0%)                |
| 3                                                                                       | 19 (44.2%)              |
| First-pass successful reperfusion (mTICI 2b-3)                                          | 22 (52.4%)              |
| First-pass excellent reperfusion (mTICI 2-3c)*                                          | 18 (42.9%)              |
| Use of rescue therapy <sup>#</sup>                                                      | 18 (41.9%)              |
| Time from puncture to mTICI 2b-3, median (IQR)                                          | 33 (201-56)<br>N=36     |
| Time from puncture to closure, median (IQR)                                             | 75 (40.5-103.5)         |
| <b>Clinical outcomes</b>                                                                |                         |
| 90-d good outcome (mRS, 0–2), n (%)                                                     | 21/42 (50%)             |
| EQ-5D at 90 days, median [IQR]                                                          | 80 [50-95]<br>(N=31)    |
| ALDS at 90 days, median [IQR]                                                           | 93.3% [70.8%-100%]      |
| Mean (SD)                                                                               | 80.0% (30.0%)<br>(N=31) |
| *Angio after first pass was not available from one lead in patient.                     |                         |
| <sup>#</sup> Stentriever, IA tPA angioplasty or stenting.                               |                         |

Supplementary Table VIII. Primary and Secondary Safety Endpoints in lead-in patients.

|                                                                             | TIGER             |
|-----------------------------------------------------------------------------|-------------------|
|                                                                             | Lead-In<br>(n=43) |
| Primary safety composite endpoint, n (%)                                    |                   |
| Symptomatic intracranial hemorrhage within 24h and 90d all-cause mortality* | 10 (23.26%)       |
| Secondary safety endpoints, n (%)                                           |                   |
| Symptomatic intracranial hemorrhage within 24h**                            | 1 (2.3%)          |
| 90d all-cause mortality                                                     | 10 (23.3%)        |
| Asymptomatic intracranial hemorrhage within 24h                             | 14 (32.6%)        |
| Neurological deterioration within 24h                                       | 5 (11.6%)         |
| Embolization to new territory                                               | 1 (2.4%)          |

Supplementary Table IX: Radiologic classification of asymptomatic intracranial hemorrhages among lead-in, main-study, and all patients

| Endpoint                  | Lead-In Phase Only<br>(N=43) | Main-Study Phase<br>(N=116) | All patients<br>(N=159) <sup>†</sup> |
|---------------------------|------------------------------|-----------------------------|--------------------------------------|
| Total                     | 14 (32.6%)                   | <b>36 (31.0%)</b>           | 50 (31.4%)                           |
| HI total                  | 4 (9.3%)                     | <b>14 (12%)</b>             | 18 (11.3%)                           |
| HI-1 Tiger only           | 1 (2.3%)                     | <b>10 (8.6%)</b>            | 11 (6.9%)                            |
| HI-1 Tiger + rescue       | 3 (7%)                       | <b>4 (3.4%)</b>             | 7 (4.3%)                             |
| HI-2 total                | 3 (7%)                       | <b>11 (9.5%)</b>            | 14 (8.8%)                            |
| HI-2 Tiger only           | 2 (4.7%)                     | <b>7 (6.0%)</b>             | 9 (5.6%)                             |
| HI-2 Tiger + rescue       | 1 (2.3%)                     | <b>4 (3.4)</b>              | 5 (3.1%)                             |
| PH-1 total                | 0                            | <b>0</b>                    | 0                                    |
| PH-2 total                | 0                            | <b>3 (2.6%)</b>             | 3 (1.8%)                             |
| PH-2 Tiger only           | 0                            | <b>3 (2.6%)</b>             | 3 (1.8%)                             |
| PH-2 Tiger + rescue       | 0                            | <b>0</b>                    | 0                                    |
| SAH total                 | 6 (13.9%)                    | <b>5 (4.3%)</b>             | 11 (6.9%)                            |
| SAH Tiger only            | 4 (9.3%)                     | <b>3 (2.6%)</b>             | 7 (4.3%)                             |
| SAH Tiger + rescue        | 2 (4.7%)                     | <b>2 (1.7%)</b>             | 4 (2.5%)                             |
| SAH + HI-2                | 0                            | <b>2 (1.7%)</b>             | 2 (1.3%)                             |
| SAH + HI-2 Tiger only     | 0                            | <b>1 (0.9%)</b>             | 1 (0.6%)                             |
| SAH + HI-2 Tiger + rescue | 0                            | <b>1 (0.9%)</b>             | 1 (0.6%)                             |
| SAH + PH-2                | 1 (2.3%)                     | <b>1 (0.9%)</b>             | 2 (1.2%)                             |
| SAH + PH-2 Tiger only     | 0                            | <b>1 (0.9%)</b>             | 1 (0.6%)                             |
| SAH + PH-2 Tiger + rescue | 1 (2.3%)                     | <b>0</b>                    | 1 (0.6%)                             |

<sup>†</sup> Crosses indicate reduced sample size due to missing 24 hour CT or final angiogram

Supplementary Table X: Listing of cases of hemorrhages not meeting sICH criteria definition but adjudicated as SAEs.

| Event number                                                                     | NIHSS baseline | NIHSS 24 hours | Relationship to Target Vessels\<br>Index Procedure\<br>Tigertriever Device | ICH Type |
|----------------------------------------------------------------------------------|----------------|----------------|----------------------------------------------------------------------------|----------|
| 1                                                                                | 21             | 10             | Possible /<br>Possible /<br>Possible                                       | SAH*     |
| 2                                                                                | 29             | 27             | Possible /<br>Definite /<br>Possible                                       | SAH      |
| 3                                                                                | 12             | 15             | Possible /<br>Possible /<br>Possible                                       | PH2/SAH  |
| 4                                                                                | 19             | 19             | Possible /<br>Possible /<br>Unrelated                                      | PH2      |
| 5                                                                                | 9              | 8              | Definite /<br>Definite /<br>Possible                                       | SAH      |
| 6                                                                                | 28             | 25             | Unrelated/<br>Unrelated/<br>Unrelated                                      | SAH/PH2  |
| 7                                                                                | 18             | 19             | Unlikely /<br>Unlikely /<br>Unlikely                                       | PH2      |
| 8                                                                                | 21             | 1              | Unrelated/<br>Unrelated/<br>Unrelated                                      | SAH      |
| 9                                                                                | 25             | 16             | Definite /<br>Unrelated/<br>Unrelated                                      | HI-2     |
| 10                                                                               | 14             | 30             | Unrelated/<br>Unrelated/<br>Unrelated                                      | SAH      |
| 11                                                                               | 11             | 16             | Possible /<br>Possible /<br>Unrelated                                      | SAH/HI-2 |
| (*) hemorrhage due a pseudoaneurysm at day 6. No other cases had late hemorrhage |                |                |                                                                            |          |

Supplementary Table XI. Serious Adverse Events in TIGER trial

| <b>System Organ Class (SOC)</b>                                                                 | <b>Lead-In<br/>(N=43)</b> | <b>Post Lead-In<br/>(N=117)</b> | <b>Overall<br/>(N=160)</b> |
|-------------------------------------------------------------------------------------------------|---------------------------|---------------------------------|----------------------------|
| Blood and lymphatic system disorders                                                            | 6 (14.0%)                 | 11 (9.4%)                       | 17 (10.6%)                 |
| Cardiac disorders                                                                               | 8 (18.6%)                 | 23 (19.7%)                      | 31 (19.4%)                 |
| Congenital, familial and genetic disorders                                                      | 0                         | 1 (0.9%)                        | 1 (0.6%)                   |
| Ear and labyrinth disorders                                                                     | 1 (2.3%)                  | 1 (0.9%)                        | 2 (1.3%)                   |
| Endocrine disorders                                                                             | 0                         | 2 (1.7%)                        | 2 (1.3%)                   |
| Gastrointestinal disorders                                                                      | 13 (30.2%)                | 11 (9.4%)                       | 24 (15.0%)                 |
| General disorders and administration site conditions                                            | 5 (11.6%)                 | 7 (6.0%)                        | 12 (7.5%)                  |
| Infections and infestations                                                                     | 9 (20.9%)                 | 11 (9.4%)                       | 20 (12.5%)                 |
| Infections and infestations Infections and infestations                                         | 0                         | 1 (0.9%)                        | 1 (0.6%)                   |
| Injury, poisoning and procedural complications                                                  | 7 (16.3%)                 | 12 (10.3%)                      | 19 (11.9%)                 |
| Injury, poisoning and procedural complications Injury, poisoning and procedural complications   | 0                         | 1 (0.9%)                        | 1 (0.6%)                   |
| Injury, poisoning and procedural complications Vascular disorders                               | 1 (2.3%)                  | 0                               | 1 (0.6%)                   |
| Investigations                                                                                  | 2 (4.7%)                  | 8 (6.8%)                        | 10 (6.3%)                  |
| Metabolism and nutrition disorders                                                              | 9 (20.9%)                 | 19 (16.2%)                      | 28 (17.5%)                 |
| Metabolism and nutrition disorders General disorders and administration site conditions         | 0                         | 1 (0.9%)                        | 1 (0.6%)                   |
| Musculoskeletal and connective tissue disorders                                                 | 0                         | 10 (8.5%)                       | 10 (6.3%)                  |
| Musculoskeletal and connective tissue disorders Musculoskeletal and connective tissue disorders | 0                         | 1 (0.9%)                        | 1 (0.6%)                   |
| Musculoskeletal and connective tissue disorders Psychiatric disorders                           | 0                         | 1 (0.9%)                        | 1 (0.6%)                   |

| <b>System Organ Class (SOC)</b>                                     | <b>Lead-In<br/>(N=43)</b> | <b>Post Lead-In<br/>(N=117)</b> | <b>Overall<br/>(N=160)</b> |
|---------------------------------------------------------------------|---------------------------|---------------------------------|----------------------------|
| Neoplasms benign, malignant and unspecified (incl cysts and polyps) | 1 (2.3%)                  | 1 (0.9%)                        | 2 (1.3%)                   |
| Nervous system disorders                                            | 23 (53.5%)                | 41 (35.0%)                      | 64 (40.0%)                 |



## Supplementary Results Text I: Reperfusion Rates with Tigertriever and Tigertriever 17 and in Each Target Artery

For the comparison between Tigertriever and Tigertriever 17, 129 patients who were treated with only one type of device were analyzed. For the primary efficacy endpoint, successful revascularization rates defined as mTICI  $\geq 2b$  within three passes were similar for the Tigertriever (94/112, 83.9%) and the Tigertriever 17 (15/17, 88.2%),  $p = 1.00$ . For excellent reperfusion (mTICI 2c-3) within three passes, rates were also similar: Tigertriever 74/112, 66.1%; Tigertriever 17 – 11/17, 64.7%,  $p = 0.91$ . For the primary safety endpoint, rates of the composite of symptomatic intracranial hemorrhage and/or all-cause mortality by 90 days were also similar for the Tigertriever (21/111, 18.9%) and the Tigertriever 17 (4/17, 23.5%),  $p=0.74$ . These data suggest similar performance of the Tigertriever and Tigertriever 17 devices.

Reperfusion rates in all (combined Lead-In and Main Study Phase) patients and in Main Study Phase patients alone by target artery were: ICA - All 23/31 (74.2%), Main Study Phase 21/24 (87.5%); M1 MCA - All 71/87 (81.6%), Main Study Phase 55/67 (82.1%); M2 MCA: All 32/37 (86.5%), Main Study Phase 20/23 (87.0%).
