# Supplementary material for: New Class of Radially Adjustable Stentrievers for Acute Ischemic Stroke: Primary Results of the Multicenter TIGER Trial
Source: PubMed Central journal article supplement — Stroke. 2021 Mar 19;52(5):1534–44. doi: 10.1161/STROKEAHA.121.034436 (PMC8078128; doi:10.1161/strokeaha.121.034436), 2021-03-19
Supplement: str-52-1534-s004.pdf [file str-52-1534-s004.pdf]

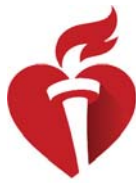

**American  
Stroke  
Association.**  
A division of the  
American Heart Association.

## Acknowledgment Permission Form

---

**Journal** Stroke

**Manuscript Number** STROKE/2021/034436R1

**First Author** Gupta

**Title of Work** \_\_\_\_\_

Authors must provide written permission/approval from all individuals mentioned by name in the Acknowledgments section of a submitted manuscript. By signing this form, any and all acknowledged persons therefore state that they have read and approved the mention of their names in the Acknowledgment section of the aforementioned paper.

|           |                      |           |                                                                                           |      |                       |
|-----------|----------------------|-----------|-------------------------------------------------------------------------------------------|------|-----------------------|
| Name (1)  | <u>Colin Derdeyn</u> | Signature | <u></u> | Date | <u>March 12, 2021</u> |
| Name (2)  | _____                | Signature | _____                                                                                     | Date | _____                 |
| Name (3)  | _____                | Signature | _____                                                                                     | Date | _____                 |
| Name (4)  | _____                | Signature | _____                                                                                     | Date | _____                 |
| Name (5)  | _____                | Signature | _____                                                                                     | Date | _____                 |
| Name (6)  | _____                | Signature | _____                                                                                     | Date | _____                 |
| Name (7)  | _____                | Signature | _____                                                                                     | Date | _____                 |
| Name (8)  | _____                | Signature | _____                                                                                     | Date | _____                 |
| Name (9)  | _____                | Signature | _____                                                                                     | Date | _____                 |
| Name (10) | _____                | Signature | _____                                                                                     | Date | _____                 |
| Name (11) | _____                | Signature | _____                                                                                     | Date | _____                 |
| Name (12) | _____                | Signature | _____                                                                                     | Date | _____                 |
| Name (13) | _____                | Signature | _____                                                                                     | Date | _____                 |
| Name (14) | _____                | Signature | _____                                                                                     | Date | _____                 |
| Name (15) | _____                | Signature | _____                                                                                     | Date | _____                 |
| Name (16) | _____                | Signature | _____                                                                                     | Date | _____                 |
| Name (17) | _____                | Signature | _____                                                                                     | Date | _____                 |
| Name (18) | _____                | Signature | _____                                                                                     | Date | _____                 |
| Name (19) | _____                | Signature | _____                                                                                     | Date | _____                 |
| Name (20) | _____                | Signature | _____                                                                                     | Date | _____                 |
